# Supplementary material
Source: publisher site journal article supplement (https://www.spandidos-publications.com/391/downloadSupplementary)
Supplement: Supplementary file 1 [file downloadSupplementary]

## Sheet: Diff distribution
	Regulation	Quant category	Number of proteins
	Downregulated	Q1(0~0.67)	50
		Q2(0.67~0.77)	111
	Upregulated	Q3(1.3~1.5)	124
		Q4(>1.5)	64

## Sheet: HCT116_OxavsHCT116
Protein accession	Protein description	HCT116_Oxa/HCT116 Ratio	Regulated Type	Quant category	HCT116_Oxa/HCT116 P-value	Gene name	MW [kDa]	Score	Coverage [%]	Peptides	PSMs	Unique peptides	HCT116	HCT116_Oxa
O00116	"Alkyldihydroxyacetonephosphate synthase, peroxisomal OS=Homo sapiens GN=AGPS"	1.719	Up	Q4	1e-32	AGPS	72.911	210.88	33	14	26	14	0.73	1.255
O00442	RNA 3'-terminal phosphate cyclase OS=Homo sapiens GN=RTCA	1.581	Up	Q4	0.00029765	RTCA	39.336	33.2	21.6	5	6	5	0.77	1.217
O15118	Niemann-Pick C1 protein OS=Homo sapiens GN=NPC1	0.586	Down	Q1	0.00045817	NPC1	142.17	15.804	3.9	5	6	5	1.271	0.745
O15427	Monocarboxylate transporter 4 OS=Homo sapiens GN=SLC16A3	0.574	Down	Q1	1.59e-06	SLC16A3	49.469	19.2	10.8	4	7	4	1.281	0.735
O43301	Heat shock 70 kDa protein 12A OS=Homo sapiens GN=HSPA12A	1.597	Up	Q4	1.62e-05	HSPA12A	74.977	21.503	14.7	9	10	9	0.765	1.222
O43592	Exportin-T OS=Homo sapiens GN=XPOT	1.542	Up	Q4	1.9e-07	XPOT	109.96	44.578	12.7	10	12	10	0.782	1.206
O60353	Frizzled-6 OS=Homo sapiens GN=FZD6	0.616	Down	Q1	0.024459	FZD6	79.291	13.396	7.5	5	6	5	1.246	0.768
O75503	Ceroid-lipofuscinosis neuronal protein 5 OS=Homo sapiens GN=CLN5	0.461	Down	Q1	0.00187682	CLN5	41.496	5.6174	7.5	3	3	3	1.384	0.638
O75874	Isocitrate dehydrogenase [NADP] cytoplasmic OS=Homo sapiens GN=IDH1	0.487	Down	Q1	4.31e-12	IDH1	46.659	75.575	34.8	13	19	13	1.359	0.662
O76070	Gamma-synuclein OS=Homo sapiens GN=SNCG	0.525	Down	Q1	1.49e-07	SNCG	13.331	53.266	52	6	10	6	1.323	0.695
O95407	Tumor necrosis factor receptor superfamily member 6B OS=Homo sapiens GN=TNFRSF6B	1.521	Up	Q4	0.00114335	TNFRSF6B	32.679	12.745	11.7	3	5	3	0.789	1.2
P00390	"Glutathione reductase, mitochondrial OS=Homo sapiens GN=GSR"	1.895	Up	Q4	1.64e-12	GSR	56.256	221.23	35.2	14	28	14	0.685	1.298
P04083	Annexin A1 OS=Homo sapiens GN=ANXA1	1.632	Up	Q4	1.62e-12	ANXA1	38.714	305.62	67.1	23	66	23	0.755	1.232
P04350	Tubulin beta-4A chain OS=Homo sapiens GN=TUBB4A	1.621	Up	Q4	0.00029653	TUBB4A	49.585	69.845	55.2	18	97	3	0.758	1.229
P04792	Heat shock protein beta-1 OS=Homo sapiens GN=HSPB1	0.549	Down	Q1	1.62e-12	HSPB1	22.782	62.897	41.5	10	27	10	1.302	0.715
P05496	"ATP synthase F(0) complex subunit C1, mitochondrial OS=Homo sapiens GN=ATP5G1"	0.568	Down	Q1	0.0109002	ATP5G1	14.277	1.4636	5.1	1	2	1	1.286	0.73
P07437	Tubulin beta chain OS=Homo sapiens GN=TUBB	0.646	Down	Q1	4.85e-08	TUBB	49.67	131.77	50.5	17	117	4	1.223	0.79
P08174	Complement decay-accelerating factor OS=Homo sapiens GN=CD55	1.513	Up	Q4	0.00059778	CD55	41.4	6.4363	7.1	4	7	4	0.791	1.197
P08581	Hepatocyte growth factor receptor OS=Homo sapiens GN=MET	0.646	Down	Q1	0.00170216	MET	155.54	19.475	4.8	6	6	6	1.223	0.79
P08670	Vimentin OS=Homo sapiens GN=VIM	5.285	Up	Q4	1.62e-12	VIM	53.651	214.54	57.9	32	52	28	0.312	1.649
P09104	Gamma-enolase OS=Homo sapiens GN=ENO2	1.661	Up	Q4	0.00104041	ENO2	47.268	72.486	38.7	12	23	10	0.746	1.239
P10586	Receptor-type tyrosine-protein phosphatase F OS=Homo sapiens GN=PTPRF	1.581	Up	Q4	0.0032552	PTPRF	212.88	18.3	3.5	5	5	5	0.77	1.217
P10599	Thioredoxin OS=Homo sapiens GN=TXN	1.961	Up	Q4	5.65e-08	TXN	11.737	30.531	48.6	5	14	5	0.669	1.312
P11166	"Solute carrier family 2, facilitated glucose transporter member 1 OS=Homo sapiens GN=SLC2A1"	0.384	Down	Q1	6.25e-07	SLC2A1	54.083	63.574	13.8	6	9	6	1.464	0.562
P11279	Lysosome-associated membrane glycoprotein 1 OS=Homo sapiens GN=LAMP1	0.563	Down	Q1	0.00020415	LAMP1	44.882	16.098	4.8	2	5	2	1.29	0.726
P12235	ADP/ATP translocase 1 OS=Homo sapiens GN=SLC25A4	1.52	Up	Q4	5.09e-07	SLC25A4	33.064	20.249	36.6	12	23	4	0.789	1.199
P13473	Lysosome-associated membrane glycoprotein 2 OS=Homo sapiens GN=LAMP2	0.631	Down	Q1	1.91e-05	LAMP2	44.96	5.4366	4.1	2	3	2	1.234	0.779
P13674	Prolyl 4-hydroxylase subunit alpha-1 OS=Homo sapiens GN=P4HA1	1.61	Up	Q4	1.8e-10	P4HA1	61.049	111.86	41.6	19	24	19	0.761	1.225
P14324	Farnesyl pyrophosphate synthase OS=Homo sapiens GN=FDPS	0.656	Down	Q1	0.00038365	FDPS	48.275	49.222	17.2	7	10	7	1.215	0.797
P15104	Glutamine synthetase OS=Homo sapiens GN=GLUL	0.441	Down	Q1	1.51e-06	GLUL	42.064	35.846	29	11	17	11	1.403	0.619
P15559	NAD(P)H dehydrogenase [quinone] 1 OS=Homo sapiens GN=NQO1	2.014	Up	Q4	1e-32	NQO1	30.867	54.643	42	11	33	11	0.657	1.323
P15586	N-acetylglucosamine-6-sulfatase OS=Homo sapiens GN=GNS	0.65	Down	Q1	1.15e-10	GNS	62.081	54.008	12.7	7	12	7	1.22	0.793
P17301	Integrin alpha-2 OS=Homo sapiens GN=ITGA2	1.97	Up	Q4	1.62e-12	ITGA2	129.29	156.84	17.6	16	28	16	0.667	1.314
P20042	Eukaryotic translation initiation factor 2 subunit 2 OS=Homo sapiens GN=EIF2S2	0.575	Down	Q1	1e-32	EIF2S2	38.388	116.22	34.5	12	24	12	1.28	0.736
P21953	"2-oxoisovalerate dehydrogenase subunit beta, mitochondrial OS=Homo sapiens GN=BCKDHB"	1.627	Up	Q4	0.0150154	BCKDHB	43.122	6.1299	4.8	2	2	2	0.756	1.23
P22676	Calretinin OS=Homo sapiens GN=CALB2	2.597	Up	Q4	4.45e-07	CALB2	31.54	26.921	28.8	7	10	7	0.549	1.426
P26447	Protein S100-A4 OS=Homo sapiens GN=S100A4	0.518	Down	Q1	2.92e-06	S100A4	11.728	12.206	36.6	5	12	5	1.33	0.689
P27105	Erythrocyte band 7 integral membrane protein OS=Homo sapiens GN=STOM	0.611	Down	Q1	2.87e-08	STOM	31.73	33.999	11.8	3	4	3	1.25	0.764
P28290	Sperm-specific antigen 2 OS=Homo sapiens GN=SSFA2	1.561	Up	Q4	1e-32	SSFA2	138.38	217.23	29.5	37	71	37	0.776	1.211
P28799	Granulins OS=Homo sapiens GN=GRN	0.576	Down	Q1	1.15e-06	GRN	63.544	28.654	13.8	6	11	6	1.279	0.737
P30838	"Aldehyde dehydrogenase, dimeric NADP-preferring OS=Homo sapiens GN=ALDH3A1"	3.301	Up	Q4	0.00102312	ALDH3A1	50.394	29.46	8.4	3	4	3	0.458	1.512
P31947	14-3-3 protein sigma OS=Homo sapiens GN=SFN	1.628	Up	Q4	2.47e-13	SFN	27.774	76.398	45.6	12	46	8	0.756	1.231
P36952	Serpin B5 OS=Homo sapiens GN=SERPINB5	2.306	Up	Q4	9.77e-12	SERPINB5	42.1	102.55	34.7	9	18	9	0.598	1.379
P46926	Glucosamine-6-phosphate isomerase 1 OS=Homo sapiens GN=GNPDA1	1.532	Up	Q4	1.25e-09	GNPDA1	32.668	86.983	30.8	6	9	4	0.785	1.203
P48506	Glutamate--cysteine ligase catalytic subunit OS=Homo sapiens GN=GCLC	1.693	Up	Q4	8.43e-11	GCLC	72.765	119.05	29.4	16	25	15	0.737	1.248
P49327	Fatty acid synthase OS=Homo sapiens GN=FASN	0.626	Down	Q1	1e-32	FASN	273.42	323.31	37.8	78	157	78	1.238	0.775
P49441	Inositol polyphosphate 1-phosphatase OS=Homo sapiens GN=INPP1	2.02	Up	Q4	0.0027209	INPP1	43.998	30.403	15.5	6	8	6	0.656	1.325
P49748	"Very long-chain specific acyl-CoA dehydrogenase, mitochondrial OS=Homo sapiens GN=ACADVL"	1.833	Up	Q4	1e-32	ACADVL	70.389	194.35	46.4	26	49	26	0.7	1.283
P49959	Double-strand break repair protein MRE11A OS=Homo sapiens GN=MRE11A	1.523	Up	Q4	0.0142798	MRE11A	80.592	12.951	6.5	5	5	5	0.788	1.2
P50454	Serpin H1 OS=Homo sapiens GN=SERPINH1	0.655	Down	Q1	1e-32	SERPINH1	46.44	118.26	38	13	32	13	1.216	0.796
P51648	Fatty aldehyde dehydrogenase OS=Homo sapiens GN=ALDH3A2	2.351	Up	Q4	1.63e-12	ALDH3A2	54.847	80.4	24.9	10	24	10	0.59	1.387
P51991	Heterogeneous nuclear ribonucleoprotein A3 OS=Homo sapiens GN=HNRNPA3	1.65	Up	Q4	1e-32	HNRNPA3	39.594	246.27	37.6	15	44	15	0.749	1.236
P55327	Tumor protein D52 OS=Homo sapiens GN=TPD52	1.817	Up	Q4	3.73e-10	TPD52	24.327	55.638	43.8	10	15	10	0.704	1.279
P61457	Pterin-4-alpha-carbinolamine dehydratase OS=Homo sapiens GN=PCBD1	0.654	Down	Q1	0.00122122	PCBD1	11.999	20.651	31.7	3	3	3	1.217	0.796
P61927	60S ribosomal protein L37 OS=Homo sapiens GN=RPL37	0.602	Down	Q1	3.82e-05	RPL37	11.078	6.574	39.2	5	9	5	1.257	0.757
P62633	Cellular nucleic acid-binding protein OS=Homo sapiens GN=CNBP	0.649	Down	Q1	2.58e-07	CNBP	19.463	40.092	30.5	5	8	5	1.22	0.792
P62910	60S ribosomal protein L32 OS=Homo sapiens GN=RPL32	0.666	Down	Q1	0.00044009	RPL32	15.86	16.102	37	6	15	6	1.208	0.804
Q02952	A-kinase anchor protein 12 OS=Homo sapiens GN=AKAP12	0.529	Down	Q1	1e-32	AKAP12	191.48	323.31	37.3	52	106	52	1.32	0.698
Q02978	Mitochondrial 2-oxoglutarate/malate carrier protein OS=Homo sapiens GN=SLC25A11	1.697	Up	Q4	7.69e-05	SLC25A11	34.061	25.577	31.5	9	12	9	0.736	1.249
Q03135	Caveolin-1 OS=Homo sapiens GN=CAV1	0.329	Down	Q1	6.28e-09	CAV1	20.471	25.007	37.6	6	13	6	1.527	0.503
Q04446	"1,4-alpha-glucan-branching enzyme OS=Homo sapiens GN=GBE1"	1.625	Up	Q4	1.66e-11	GBE1	80.473	77.657	17.2	12	15	12	0.757	1.23
Q07021	"Complement component 1 Q subcomponent-binding protein, mitochondrial OS=Homo sapiens GN=C1QBP"	1.575	Up	Q4	5.11e-15	C1QBP	31.362	116.84	33.3	7	26	7	0.772	1.216
Q08380	Galectin-3-binding protein OS=Homo sapiens GN=LGALS3BP	0.637	Down	Q1	6.69e-08	LGALS3BP	65.33	78.998	16.9	7	12	7	1.23	0.783
Q12965	Unconventional myosin-Ie OS=Homo sapiens GN=MYO1E	1.818	Up	Q4	3.54e-06	MYO1E	127.06	22.444	7.1	7	10	7	0.704	1.28
Q13268	"Dehydrogenase/reductase SDR family member 2, mitochondrial OS=Homo sapiens GN=DHRS2"	10.04	Up	Q4	6.07e-11	DHRS2	29.926	74.154	32.1	10	30	10	0.177	1.777
Q13907	Isopentenyl-diphosphate Delta-isomerase 1 OS=Homo sapiens GN=IDI1	0.657	Down	Q1	0.00168242	IDI1	26.319	31.172	13.7	3	4	3	1.214	0.798
Q14116	Interleukin-18 OS=Homo sapiens GN=IL18	0.657	Down	Q1	9.86e-08	IL18	22.326	67.553	28	4	4	4	1.214	0.798
Q14914	Prostaglandin reductase 1 OS=Homo sapiens GN=PTGR1	2.275	Up	Q4	2.3e-05	PTGR1	35.869	43.072	17	5	7	5	0.604	1.374
Q15435	Protein phosphatase 1 regulatory subunit 7 OS=Homo sapiens GN=PPP1R7	1.508	Up	Q4	0.0023404	PPP1R7	41.564	49.871	17.2	5	6	5	0.793	1.196
Q15742	NGFI-A-binding protein 2 OS=Homo sapiens GN=NAB2	0.431	Down	Q1	0.00024342	NAB2	56.593	5.5357	6.5	4	4	4	1.414	0.609
Q15847	Adipogenesis regulatory factor OS=Homo sapiens GN=ADIRF	2.034	Up	Q4	1.46e-06	ADIRF	7.8547	56.39	39.5	5	11	5	0.653	1.328
Q16836	"Hydroxyacyl-coenzyme A dehydrogenase, mitochondrial OS=Homo sapiens GN=HADH"	1.545	Up	Q4	1.77e-11	HADH	34.293	10.418	16.2	6	10	6	0.781	1.207
Q16890	Tumor protein D53 OS=Homo sapiens GN=TPD52L1	1.687	Up	Q4	0.000178293	TPD52L1	22.449	18.803	11.8	2	4	2	0.739	1.247
Q52LW3	Rho GTPase-activating protein 29 OS=Homo sapiens GN=ARHGAP29	0.604	Down	Q1	3.98e-07	ARHGAP29	142.06	26.092	8.2	10	10	10	1.256	0.758
Q58FF8	Putative heat shock protein HSP 90-beta 2 OS=Homo sapiens GN=HSP90AB2P	0.645	Down	Q1	4.04e-05	HSP90AB2P	44.348	17.039	20.7	10	52	1	1.224	0.789
Q5T1C6	Acyl-coenzyme A thioesterase THEM4 OS=Homo sapiens GN=THEM4	1.885	Up	Q4	0.00045622	THEM4	27.129	18.518	17.1	4	4	4	0.687	1.295
Q5T1M5	FK506-binding protein 15 OS=Homo sapiens GN=FKBP15	1.52	Up	Q4	0.024583	FKBP15	133.63	9.5347	1.8	2	2	2	0.789	1.199
Q6DD88	Atlastin-3 OS=Homo sapiens GN=ATL3	0.569	Down	Q1	0.00157612	ATL3	60.541	28.39	17.2	8	9	8	1.285	0.731
Q6NVY1	"3-hydroxyisobutyryl-CoA hydrolase, mitochondrial OS=Homo sapiens GN=HIBCH"	3.455	Up	Q4	4.17e-14	HIBCH	43.482	69.344	34.7	15	27	15	0.442	1.527
Q6NZI2	Polymerase I and transcript release factor OS=Homo sapiens GN=PTRF	0.453	Down	Q1	1.91e-09	PTRF	43.476	64.143	19.7	7	13	7	1.392	0.63
Q6P5R6	60S ribosomal protein L22-like 1 OS=Homo sapiens GN=RPL22L1	0.517	Down	Q1	0.00161859	RPL22L1	14.606	19.158	29.5	2	4	2	1.33	0.688
Q6UW68	Transmembrane protein 205 OS=Homo sapiens GN=TMEM205	1.889	Up	Q4	0.000138779	TMEM205	21.198	7.6696	11.6	2	3	2	0.686	1.296
Q6UXH1	Cysteine-rich with EGF-like domain protein 2 OS=Homo sapiens GN=CRELD2	1.578	Up	Q4	0.0120798	CRELD2	38.191	26.696	12.2	5	5	5	0.771	1.217
Q6ZMU5	Tripartite motif-containing protein 72 OS=Homo sapiens GN=TRIM72	0.585	Down	Q1	1.45e-08	TRIM72	52.73	105.13	31.4	11	16	11	1.271	0.744
Q86TX2	Acyl-coenzyme A thioesterase 1 OS=Homo sapiens GN=ACOT1	1.52	Up	Q4	2.64e-06	ACOT1	46.277	1.2745	1.7	1	4	1	0.789	1.199
Q86WA6	Valacyclovir hydrolase OS=Homo sapiens GN=BPHL	1.51	Up	Q4	0.005821	BPHL	32.542	7.9601	19.9	6	7	6	0.792	1.196
Q8IUE6	Histone H2A type 2-B OS=Homo sapiens GN=HIST2H2AB	0.602	Down	Q1	0.0028021	HIST2H2AB	13.995	2.0245	17.7	3	12	1	1.258	0.757
Q8IVF2	Protein AHNAK2 OS=Homo sapiens GN=AHNAK2	1.554	Up	Q4	0.04146	AHNAK2	616.62	18.577	7.3	9	11	9	0.778	1.209
Q8IWW6	Rho GTPase-activating protein 12 OS=Homo sapiens GN=ARHGAP12	1.668	Up	Q4	4.47e-05	ARHGAP12	96.253	17.663	9.8	8	9	8	0.744	1.241
Q8IXB1	DnaJ homolog subfamily C member 10 OS=Homo sapiens GN=DNAJC10	3.183	Up	Q4	9.87e-07	DNAJC10	91.079	29.12	12.2	9	13	9	0.471	1.499
Q8N729	Neuropeptide W OS=Homo sapiens GN=NPW	0.449	Down	Q1	0.00092371	NPW	18.048	3.8901	6.1	1	2	1	1.395	0.627
Q8NBJ7	Sulfatase-modifying factor 2 OS=Homo sapiens GN=SUMF2	0.619	Down	Q1	0.00126202	SUMF2	33.843	15.442	17.9	5	8	5	1.244	0.77
Q8TBB5	Kelch domain-containing protein 4 OS=Homo sapiens GN=KLHDC4	0.656	Down	Q1	2.56e-07	KLHDC4	57.891	18.961	14.8	5	6	5	1.215	0.797
Q8WTV0	Scavenger receptor class B member 1 OS=Homo sapiens GN=SCARB1	0.516	Down	Q1	1.03e-11	SCARB1	60.877	28.228	7.6	4	10	4	1.332	0.687
Q8WU90	Zinc finger CCCH domain-containing protein 15 OS=Homo sapiens GN=ZC3H15	1.557	Up	Q4	3.07e-12	ZC3H15	48.602	88.992	18.1	8	12	8	0.777	1.21
Q8WUX9	Charged multivesicular body protein 7 OS=Homo sapiens GN=CHMP7	1.581	Up	Q4	0.017517	CHMP7	50.91	6.3551	8.8	3	3	3	0.77	1.217
Q92820	Gamma-glutamyl hydrolase OS=Homo sapiens GN=GGH	1.684	Up	Q4	0.035119	GGH	35.964	55.556	20.8	7	9	7	0.74	1.246
Q96HY7	"Probable 2-oxoglutarate dehydrogenase E1 component DHKTD1, mitochondrial OS=Homo sapiens GN=DHTKD1"	1.513	Up	Q4	0.0014232	DHTKD1	103.08	6.2244	2.3	2	2	2	0.791	1.197
Q96LD4	Tripartite motif-containing protein 47 OS=Homo sapiens GN=TRIM47	0.574	Down	Q1	3.25e-06	TRIM47	69.531	38.622	13.9	8	11	8	1.281	0.735
Q99878	Histone H2A type 1-J OS=Homo sapiens GN=HIST1H2AJ	0.471	Down	Q1	0.00063867	HIST1H2AJ	13.936	8.1266	21.1	5	38	1	1.374	0.647
Q9BQL6	Fermitin family homolog 1 OS=Homo sapiens GN=FERMT1	1.644	Up	Q4	4.09e-08	FERMT1	77.436	31.986	15.7	9	14	7	0.751	1.235
Q9BS26	Endoplasmic reticulum resident protein 44 OS=Homo sapiens GN=ERP44	1.861	Up	Q4	2.17e-13	ERP44	46.971	79.876	28.6	12	22	12	0.693	1.29
Q9BZI7	Regulator of nonsense transcripts 3B OS=Homo sapiens GN=UPF3B	0.602	Down	Q1	2.48e-05	UPF3B	57.761	5.3144	5.2	2	3	2	1.257	0.757
Q9C0E8	Protein lunapark OS=Homo sapiens GN=LNP	2.014	Up	Q4	0.00052251	LNP	47.739	36.124	15.2	6	9	6	0.657	1.323
Q9H4B0	"Probable tRNA N6-adenosine threonylcarbamoyltransferase, mitochondrial OS=Homo sapiens GN=OSGEPL1"	1.878	Up	Q4	0.006241	OSGEPL1	45.122	15.147	8.9	3	4	3	0.689	1.294
Q9H7E9	UPF0488 protein C8orf33 OS=Homo sapiens GN=C8orf33	0.615	Down	Q1	0.037724	C8orf33	24.992	43.653	21	4	6	4	1.247	0.767
Q9HBI6	Phylloquinone omega-hydroxylase CYP4F11 OS=Homo sapiens GN=CYP4F11	1.606	Up	Q4	0.0113783	CYP4F11	60.145	14.56	12.2	6	7	6	0.762	1.224
Q9NR45	Sialic acid synthase OS=Homo sapiens GN=NANS	1.893	Up	Q4	8.37e-11	NANS	40.307	79.893	38.4	12	18	12	0.685	1.297
Q9NZ45	CDGSH iron-sulfur domain-containing protein 1 OS=Homo sapiens GN=CISD1	1.561	Up	Q4	2.01e-06	CISD1	12.199	28.898	52.8	6	15	6	0.776	1.211
Q9NZN4	EH domain-containing protein 2 OS=Homo sapiens GN=EHD2	0.659	Down	Q1	0.00021575	EHD2	61.161	30.305	16.8	8	10	6	1.213	0.799
Q9UBR2	Cathepsin Z OS=Homo sapiens GN=CTSZ	0.55	Down	Q1	0.000121073	CTSZ	33.868	11.23	11.2	3	4	3	1.301	0.716
Q9UGT4	Sushi domain-containing protein 2 OS=Homo sapiens GN=SUSD2	0.522	Down	Q1	0.03052	SUSD2	90.207	15.645	6.2	4	4	4	1.326	0.692
Q9Y2D5	A-kinase anchor protein 2 OS=Homo sapiens GN=AKAP2	1.608	Up	Q4	1.77e-07	AKAP2	94.659	57.978	9.8	8	10	8	0.762	1.225
Q9Y2H0	Disks large-associated protein 4 OS=Homo sapiens GN=DLGAP4	1.502	Up	Q4	0.0038429	DLGAP4	108.01	7.7341	3.1	3	3	3	0.795	1.194
